# Supplementary material for: How does psychosocial stress affect the relationship between socioeconomic disadvantage and overweight and obesity? Examining Hemmingsson’s model with data from a Danish longitudinal study
Source: Springer Nature journal article supplement (doi:10.1186/s12889-019-7699-8), 2019-11-07
Supplement: MOESM1 [file 17362232]

Table S1. Unadjusted estimates for the association between the individual proxies from the 5 domains (Hemmingsson:2014) and overweight and obesity at age 15, 18, 21 and 28 years (girls).

|                                                             | <b>age=15</b> (N=1,438) | <b>age=18</b> (N=1,238) | <b>age=21</b> (N=1,075) | <b>age=28</b> (N=1,045) |
|-------------------------------------------------------------|-------------------------|-------------------------|-------------------------|-------------------------|
| <u>Adult distress</u>                                       |                         |                         |                         |                         |
| <b>Parental self-rated health</b>                           | 1,206                   | 1,010                   | 875                     | 825                     |
| Good                                                        | 1                       | 1                       | 1                       | 1                       |
| Poor                                                        | 1.2 (0.8;1.8)           | 2.4 (1.1;4.9)           | 1.7 (1.0;2.9)           | 1.7 (1.1;2.5)           |
| <u>Disharmonious family environment</u>                     |                         |                         |                         |                         |
| <b>Family functioning</b>                                   | 1,426                   | 1,128                   | 985                     | 947                     |
| Good                                                        | 1                       | 1                       | 1                       | 1                       |
| Poor                                                        | 2.3 (1.5;3.3)           | 2.0 (0.9;4.2)           | 1.3 (0.8;2.3)           | 1.6 (1.1;2.4)           |
| <u>Offspring distress (15 years)</u>                        |                         |                         |                         |                         |
| <b>Self-esteem</b>                                          | 1,429                   | 1,128                   | 987                     | 947                     |
| High                                                        | 1                       | 1                       | 1                       | 1                       |
| Low                                                         | 1.6 (1.1;2.4)           | 2.2 (1.0;4.5)           | 2.2 (1.3;3.7)           | 2.1 (1.4;3.1)           |
| <b>Depressive symptoms</b>                                  | 1,427                   | 1,129                   | 991                     | 946                     |
| No                                                          | 1                       | 1                       | 1                       | 1                       |
| Yes                                                         | 1.8 (1.2;2.6)           | 1.8 (0.9;3.7)           | 1.4 (0.9;2.3)           | 1.5 (1.0;2.1)           |
| <b>Self-rated health</b>                                    | 1,435                   | 1,133                   | 990                     | 948                     |
| Good                                                        | 1                       | 1                       | 1                       | 1                       |
| Poor                                                        | 2.4 (1.6;3.4)           | 3.0 (1.5;6.1)           | 3.1 (1.9;5.2)           | 2.7 (1.9;4.0)           |
| <u>Psychological and emotional overload (ages 15,18,21)</u> |                         |                         |                         |                         |
| <b>Avoidance coping</b>                                     | 1,428                   | 1,132                   | 922                     | 734                     |
| Low levels                                                  | 1                       | 1                       | 1                       | 1                       |
| High levels                                                 | 1.8 (1.2;2.7)           | 1.7 (0.8;3.8)           | 1.3 (0.7;2.3)           | 1.2 (0.7;1.9)           |
| <b>Perceived stress</b>                                     | 1,410                   | 1,121                   | 922                     | 764                     |
| Low levels                                                  | 1                       | 1                       | 1                       | 1                       |
| High levels                                                 | 1.4 (0.9;2.2)           | 2.0 (0.9;4.3)           | 1.9 (1.1;3.3)           | 1.2 (0.8;2.0)           |
| <b>Smoking status</b>                                       | 1,435                   | 1,134                   | 929                     | 757                     |
| Not smoking                                                 | 1                       | 1                       | 1                       | 1                       |
| Smoking                                                     | 0.9 (0.5;1.6)           | 1.4 (0.5;3.7)           | 1.8 (1.1;3.2)           | 1.9 (1.2;2.9)           |
| <u>Homeostasis disrupted (ages 15,18,21)</u>                |                         |                         |                         |                         |
| <b>Physical activity</b>                                    | 1,425                   | 1,125                   | 935                     | 753                     |
| High levels                                                 | 1                       | 1                       | 1                       | 1                       |
| Low levels                                                  | 2.1 (1.4;3.1)           | 2.1 (1.0;4.3)           | 1.5 (0.9;2.6)           | 2.0 (1.3;3.0)           |
| <b>Computer time</b>                                        | 1,437                   | 1,137                   | 932                     | 755                     |
| Low                                                         | 1                       | 1                       | 1                       | 1                       |
| High                                                        | 1.3 (0.7;2.3)           | 2.1 (0.8;5.6)           | 1.2 (0.7;2.0)           | 1.6 (1.1;2.5)           |
