# Supplementary material for: How does psychosocial stress affect the relationship between socioeconomic disadvantage and overweight and obesity? Examining Hemmingsson’s model with data from a Danish longitudinal study
Source: Springer Nature journal article supplement (doi:10.1186/s12889-019-7699-8), 2019-11-07
Supplement: MOESM2 [file 17362232]

Table S2. Unadjusted estimates for the association between the individual proxies from the 5 domains (Hemmingsson:2014) and overweight and obesity at age 15, 18, 21 and 28 years (boys).

|                                                             | <b>age=15</b> (N=1,441) |               | <b>age=18</b> (N=1,067) |                | <b>age=21</b> (N=886) |               | <b>age=28</b> (N=827) |               |
|-------------------------------------------------------------|-------------------------|---------------|-------------------------|----------------|-----------------------|---------------|-----------------------|---------------|
|                                                             | <u>n</u>                | <u>OR</u>     | <u>n</u>                | <u>OR</u>      | <u>n</u>              | <u>OR</u>     | <u>n</u>              | <u>OR</u>     |
| <u>Adult distress</u>                                       |                         |               |                         |                |                       |               |                       |               |
| <b>Parental self-rated health</b>                           | 1,199                   |               | 857                     |                | 707                   |               | 621                   |               |
| Good                                                        |                         | 1             |                         | 1              |                       | 1             |                       | 1             |
| Poor                                                        |                         | 1.5 (1.1;2.1) |                         | 1.7 (0.8;3.6)  |                       | 1.2 (0.6;2.2) |                       | 0.9 (0.6;1.6) |
| <u>Disharmonious family environment</u>                     |                         |               |                         |                |                       |               |                       |               |
| <b>Family functioning</b>                                   | 1,424                   |               | 955                     |                | 796                   |               | 699                   |               |
| Good                                                        |                         | 1             |                         | 1              |                       | 1             |                       | 1             |
| Poor                                                        |                         | 1.2 (0.8;1.7) |                         | 0.9 (0.4;2.1)  |                       | 1.3 (0.7;2.4) |                       | 0.9 (0.5;1.5) |
| <u>Offspring distress (15 years)</u>                        |                         |               |                         |                |                       |               |                       |               |
| <b>Self-esteem</b>                                          | 1,434                   |               | 960                     |                | 799                   |               | 708                   |               |
| High                                                        |                         | 1             |                         | 1              |                       | 1             |                       | 1             |
| Low                                                         |                         | 1.3 (0.9;1.9) |                         | 1.8 (0.7;4.2)  |                       | 1.1 (0.5;2.3) |                       | 1.2 (0.6;2.1) |
| <b>Depressive symptoms</b>                                  | 1,418                   |               | 954                     |                | 793                   |               | 700                   |               |
| No                                                          |                         | 1             |                         | 1              |                       | 1             |                       | 1             |
| Yes                                                         |                         | 1.2 (0.9;1.7) |                         | 1.6 (0.8;3.3)  |                       | 1.1 (0.6;2.1) |                       | 1.2 (0.8;1.9) |
| <b>Self-rated health</b>                                    | 1,435                   |               | 958                     |                | 793                   |               | 705                   |               |
| Good                                                        |                         | 1             |                         | 1              |                       | 1             |                       | 1             |
| Poor                                                        |                         | 2.2 (1.6;3.2) |                         | 5.1 (2.5;10.5) |                       | 2.2 (1.2;4.1) |                       | 2.4 (1.5;3.9) |
| <u>Psychological and emotional overload (ages 15,18,21)</u> |                         |               |                         |                |                       |               |                       |               |
| <b>Avoidance coping</b>                                     | 1,425                   |               | 954                     |                | 705                   |               | 497                   |               |
| Low levels                                                  |                         | 1             |                         | 1              |                       | 1             |                       | 1             |
| High levels                                                 |                         | 1.0 (0.7;1.5) |                         | 0.8 (0.3;2.0)  |                       | 0.5 (0.2;1.3) |                       | 1.6 (0.9;2.8) |
| <b>Perceived stress</b>                                     | 1,421                   |               | 956                     |                | 706                   |               | 504                   |               |
| Low levels                                                  |                         | 1             |                         | 1              |                       | 1             |                       | 1             |
| High levels                                                 |                         | 1.2 (0.8;1.7) |                         | 2.6 (1.2;5.4)  |                       | 1.5 (0.8;3.0) |                       | 1.2 (0.6;2.3) |
| <b>Smoking status</b>                                       | 1,436                   |               | 961                     |                | 702                   |               | 503                   |               |
| Not smoking                                                 |                         | 1             |                         | 1              |                       | 1             |                       | 1             |
| Smoking                                                     |                         | 1.4 (0.9;2.3) |                         | 1.4 (0.5;4.1)  |                       | 1.5 (0.8;2.8) |                       | 1.8 (1.1;3.0) |
| <u>Homeostasis disrupted (ages 15,18,21)</u>                |                         |               |                         |                |                       |               |                       |               |
| <b>Physical activity</b>                                    | 1,435                   |               | 958                     |                | 720                   |               | 502                   |               |
| High levels                                                 |                         | 1             |                         | 1              |                       | 1             |                       | 1             |
| Low levels                                                  |                         | 1.5 (1.1;2.1) |                         | 1.8 (0.9;3.6)  |                       | 1.6 (0.8;3.1) |                       | 1.5 (0.9;2.6) |
| <b>Computer time</b>                                        | 1,434                   |               | 959                     |                | 715                   |               | 501                   |               |
| Low                                                         |                         | 1             |                         | 1              |                       | 1             |                       | 1             |
| High                                                        |                         | 1.4 (1.0;2.0) |                         | 1.2 (0.6;2.5)  |                       | 1.9 (1.0;3.4) |                       | 1.6 (0.9;2.7) |
